# Supplementary material for: Pomegranate (Punica granatum) Peel Inhibits the In Vitro and In Vivo Growth of Piroplasm Parasites
Source: Hindawi journal article supplement (doi:10.1155/2022/8574541), 2022-06-20

(A)

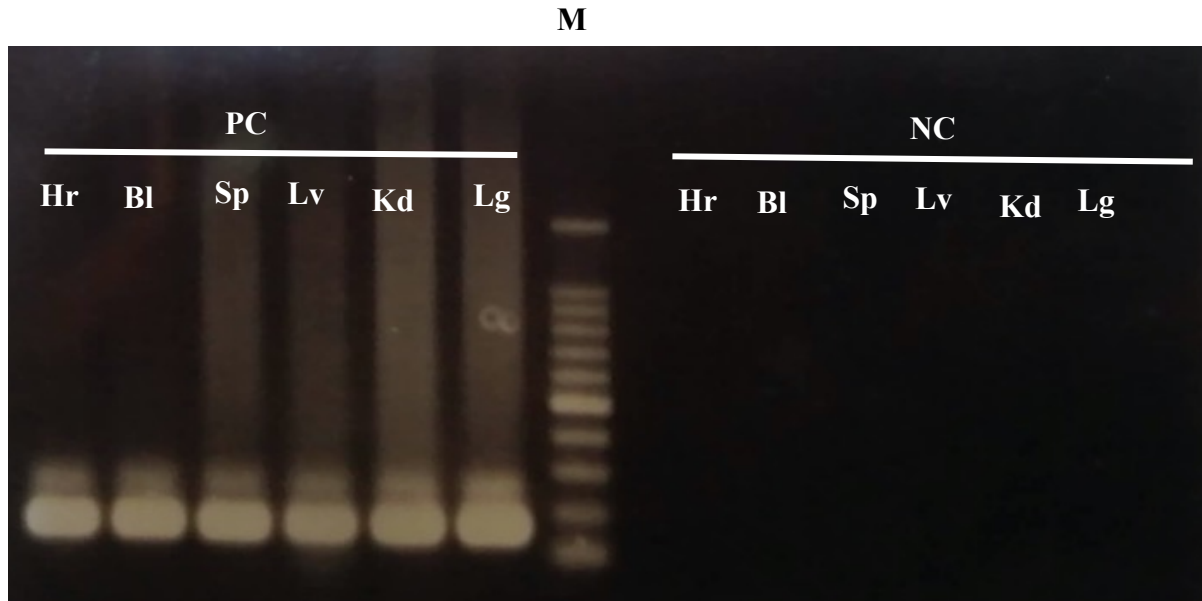

(B)

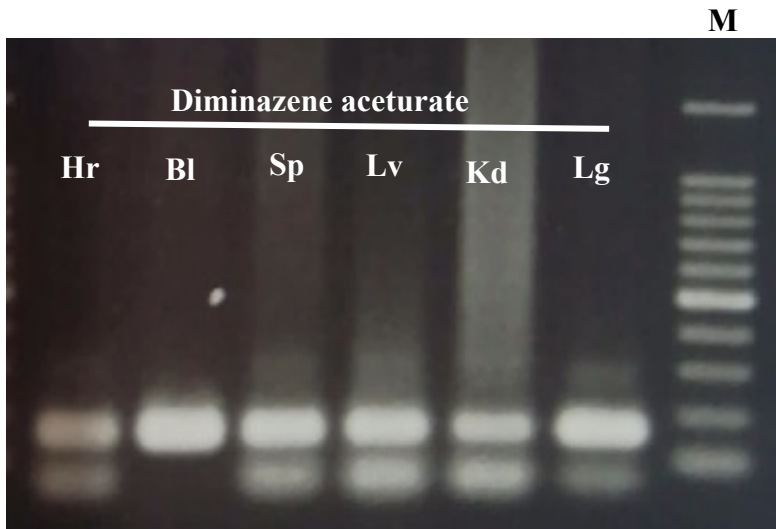

(C)

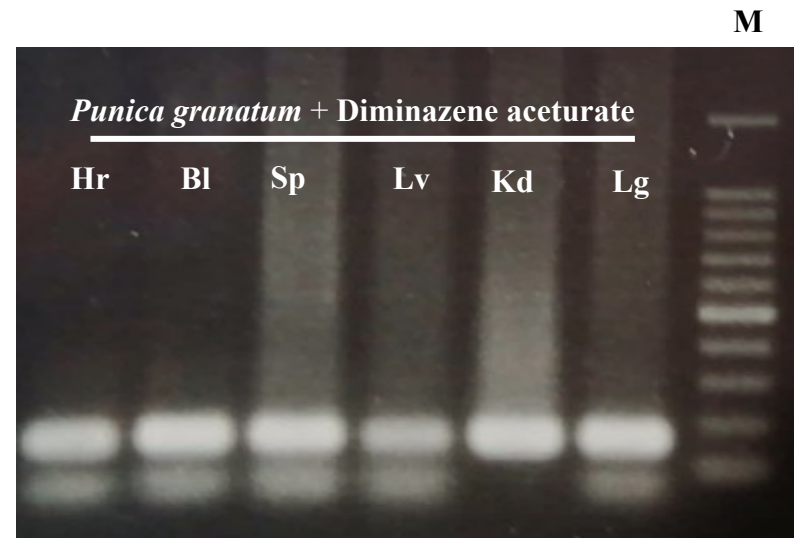

Supplement: f3 [file 8574541.f3.pdf]
